# Supplementary material for: IL-2K35C-moFA, a Long-Acting Engineered Cytokine with Decreased Interleukin 2 Receptor α Binding, Improved the Cellular Selectivity Profile and Antitumor Efficacy in a Mouse Tumor Model
Source: MDPI journal article supplement (doi:10.3390/cancers14194742), 2022-09-28
Supplement: s1 [file s1]

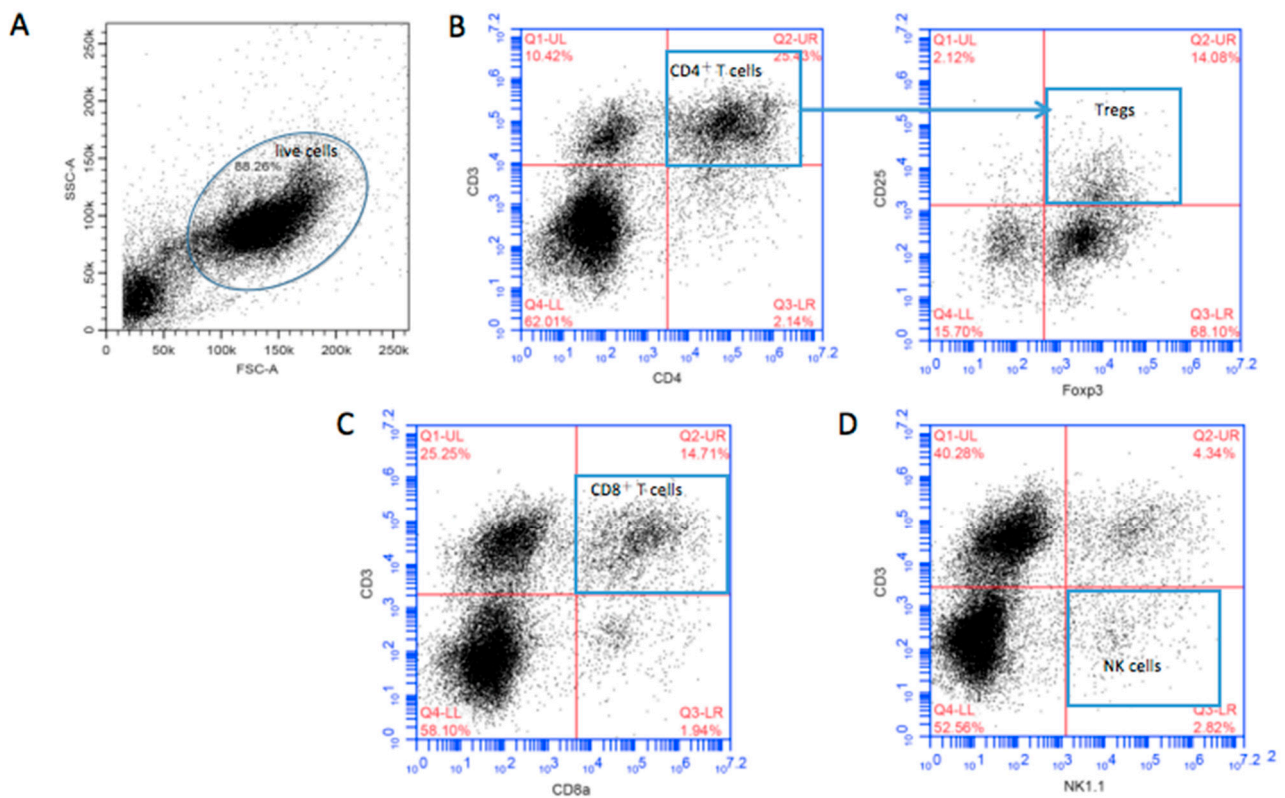

**Figure S1.** Representative flow gating for live cells and lymphocyte populations. (A) SSC-A vs. FSC-A gating for live cells. (B) CD3<sup>+</sup>, CD4<sup>+</sup> for CD4 T cells then gated for CD25<sup>+</sup>, FoxP3<sup>+</sup> Treg cells. (C) CD3<sup>+</sup>, CD8<sup>+</sup> for CD8 T cells (D) CD3<sup>+</sup>, NK1.1<sup>+</sup> for NK cells.

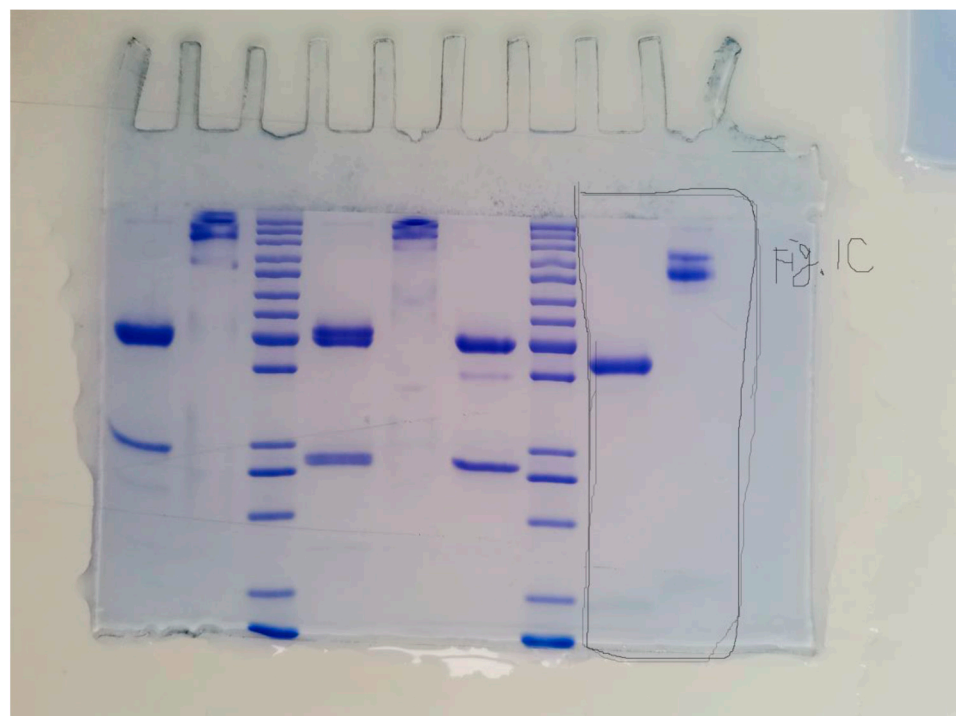

**Figure S2.** Original Western Blot for Figure 1C.

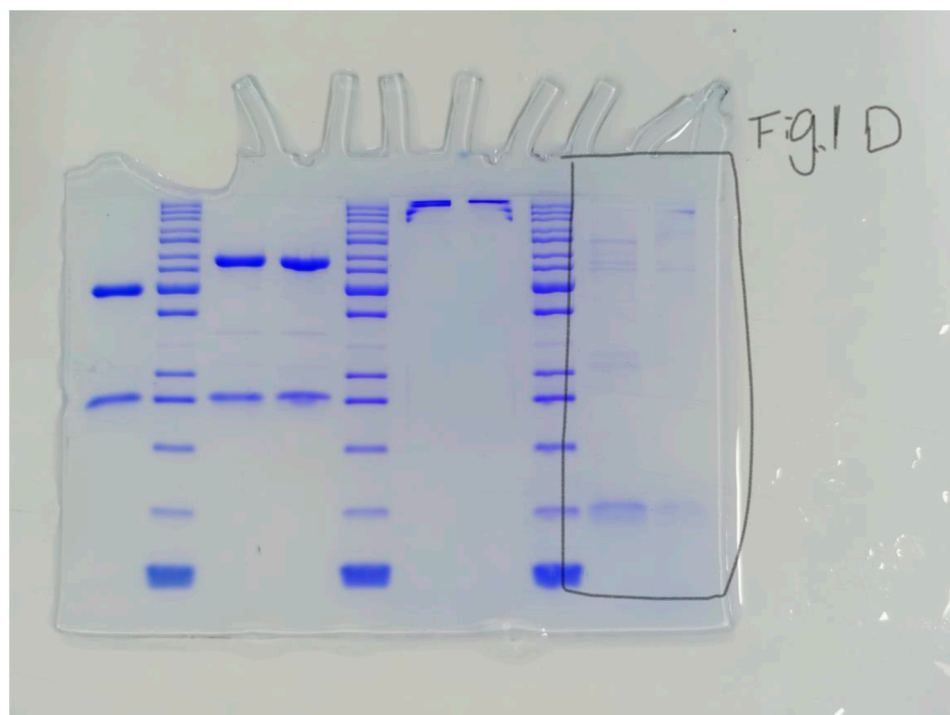

**Figure S3.** Original Western Blot for Figure 1D.

**Table S1.** Percentages of different cell types in spleens and P values.

|                                     |               | No.1  | No.2  | No.3  | No.4  | No.5  | No.6  | P value                                                                      |
|-------------------------------------|---------------|-------|-------|-------|-------|-------|-------|------------------------------------------------------------------------------|
| Tregs<br>(% live cells)             | PBS           | 3.58  | 1.98  | 2.89  | 3.03  | 1.13  | 2.57  | $\left. \begin{array}{l} < 0.0001 \\ < 0.0001 \end{array} \right\} < 0.001$  |
|                                     | IL-2WT        | 15.3  | 10.28 | 14.78 | 14.2  | 16.78 | 18.22 |                                                                              |
|                                     | IL-2K35C-moFA | 6.87  | 3.57  | 4.77  | 6.24  | 4.85  | 5.58  |                                                                              |
| NK(% live cells)                    | PBS           | 2.82  | 3.35  | 2.14  | 5.01  | 4.4   | 2.28  | $\left. \begin{array}{l} < 0.0001 \\ = 0.2258 \end{array} \right\} < 0.0001$ |
|                                     | IL-2WT        | 18.26 | 19.38 | 14.26 | 18.4  | 17.81 | 20.75 |                                                                              |
|                                     | IL-2K35C-moFA | 23.21 | 17.64 | 19.21 | 18.64 | 18.26 | 21.62 |                                                                              |
| CD8 <sup>+</sup><br>T(% live cells) | PBS           | 14.71 | 6.17  | 8.8   | 10.27 | 12.04 | 7.8   | $\left. \begin{array}{l} < 0.0001 \\ = 0.2476 \end{array} \right\} < 0.0001$ |
|                                     | IL-2WT        | 48.54 | 62.61 | 37.55 | 54.42 | 53.62 | 60.12 |                                                                              |
|                                     | IL-2K35C-moFA | 58.21 | 37.47 | 40.58 | 49.69 | 58.33 | 24.76 |                                                                              |
